# Supplementary figures and images for: Deregulation of the Replisome Factor MCMBP Prompts Oncogenesis in Colorectal Carcinomas through Chromosomal Instability
Source: PubMed Central journal article supplement — Neoplasia. 2014 Sep 20;16(9):694–709. doi: 10.1016/j.neo.2014.07.011 (PMC4235010; doi:10.1016/j.neo.2014.07.011), 2014-09-20

### Supplementary Figure 1.

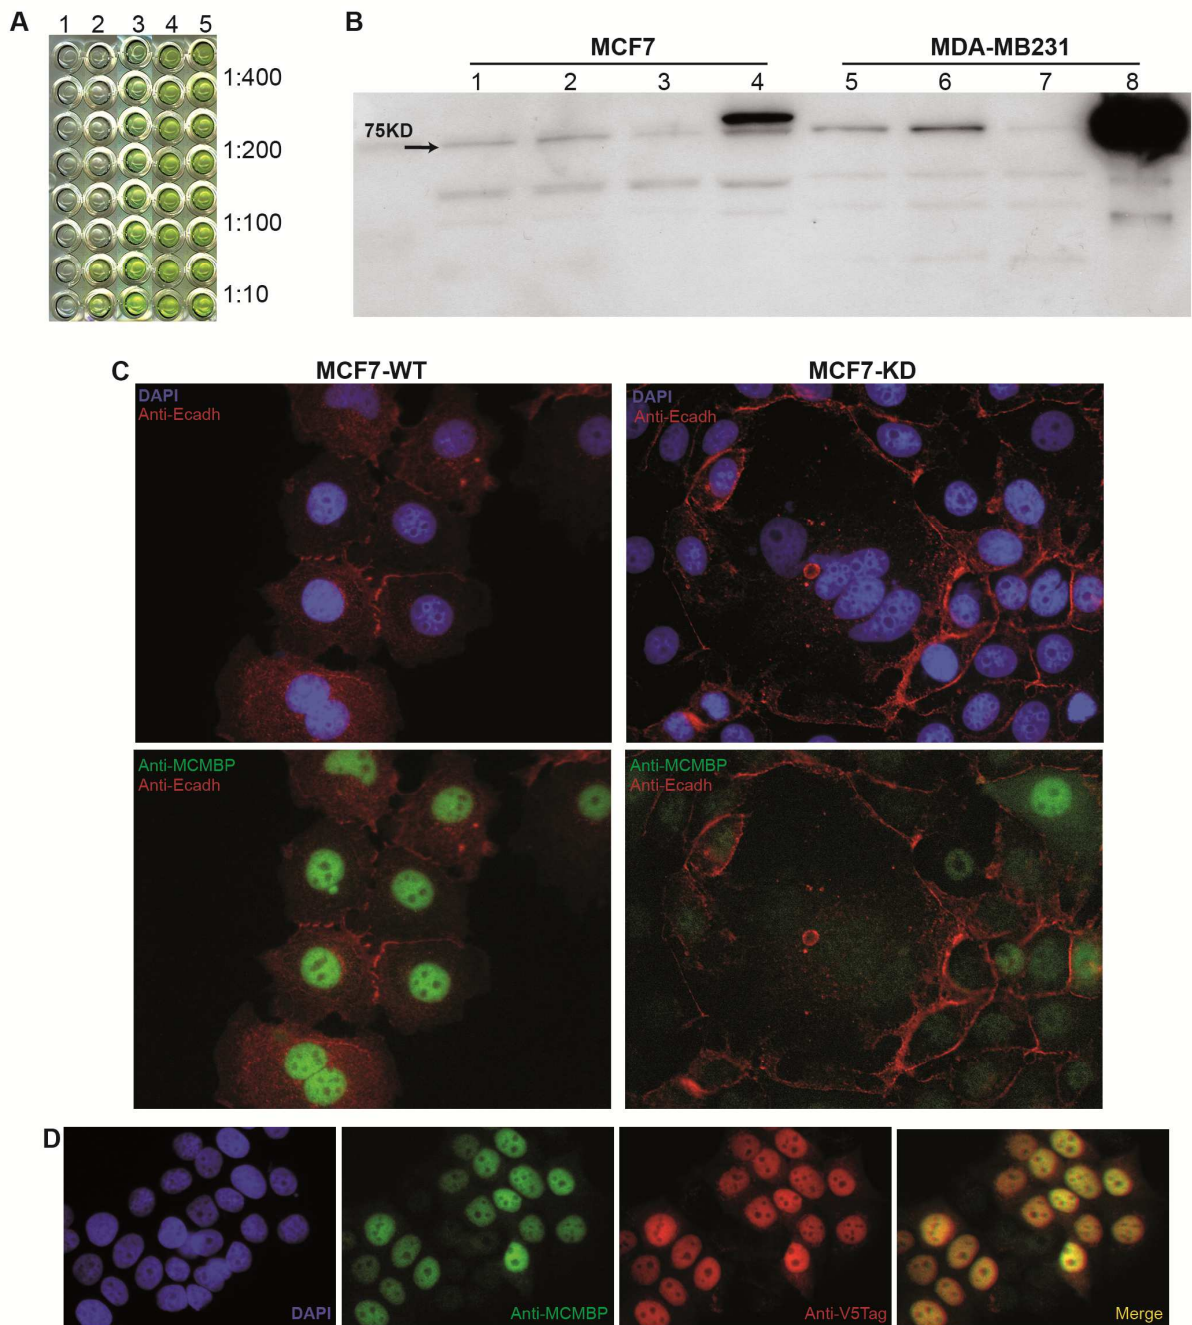

Supplementary Figure 2.

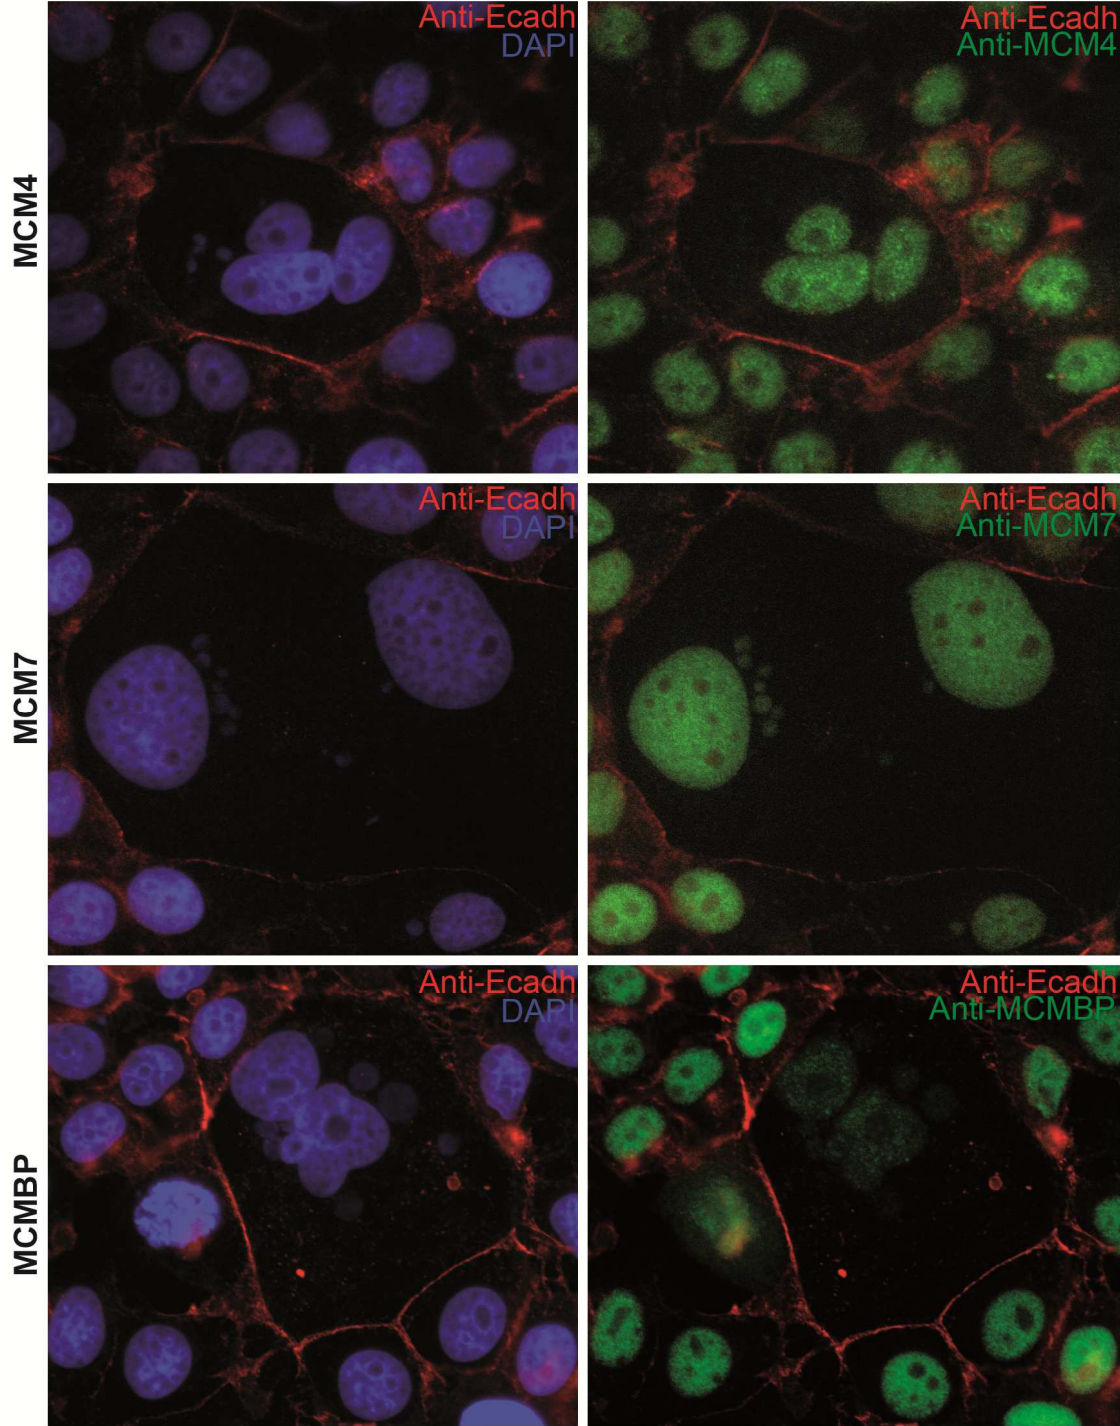

Supplementary Figure 3.

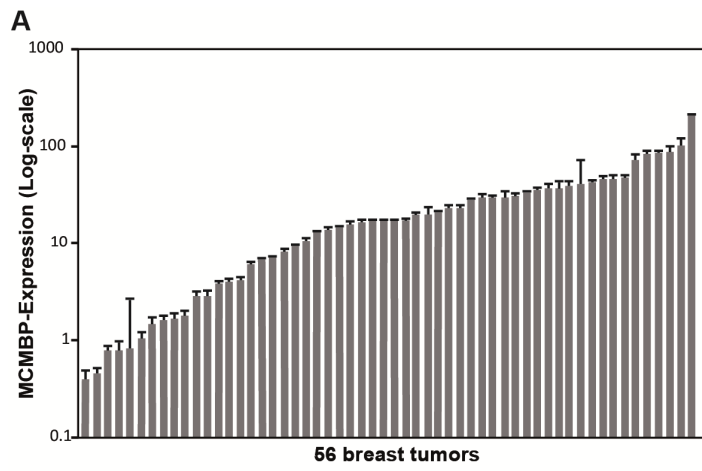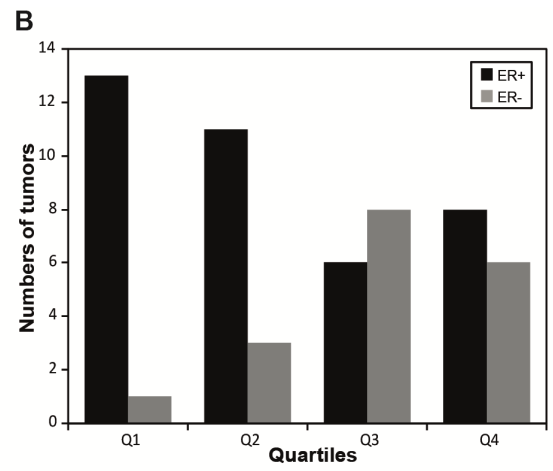

Supplement: mmc1.pdf [file mmc1.pdf]
